# Supplementary material for: Potential preventive markers in the intracerebral hemorrhage process are revealed by serum untargeted metabolomics in mice using hypertensive cerebral microbleeds
Source: Front Endocrinol (Lausanne). 2023 Apr 20;14:1084858. doi: 10.3389/fendo.2023.1084858 (PMC10159181; doi:10.3389/fendo.2023.1084858)
Supplement: Supplementary file 3 [file Table_2.xlsx]

## Sheet: 代谢物信息总览表 (3)
Metabolite	KEGG Compound ID	Mode	M/Z	Formula	Retention time	Mass Error
Taurocholic acid	C05122	pos	480.279	C26H45NO7S	5.3472	1.35661
D-Glucaro-1,4-lactone	C21095	pos	215.016	C6H8O7	1.3184	1.95836
2-amino-6-hydroxyhexanoic acid	-	pos	130.087	C6H13NO3	0.9162	1.2153
2-Keto-6-acetamidocaproate	C05548	pos	220.118	C8H13NO4	1.716	1.60025
3,4,5-trihydroxy-6-[1-(4-methoxyphenyl)-3-phenylpropoxy]oxane-2-carboxylic acid	-	pos	441.149	C22H26O8	2.419	-8.62553
Phenylacetylglycine	C05598	pos	194.082	C10H11NO3	2.6568	2.27036
Polyethylene, oxidized	-	pos	267.121	C12H20O5	3.6996	1.60381
PC(18:3/0:0)	-	pos	518.325	C26H48NO7P	7.3532	1.82058
Capryloylglycine	-	pos	202.144	C10H19NO3	4.5463	1.31274
L-NNA	-	pos	220.104	C6H13N5O4	0.8555	0.833683
Gly Gly Gly Val	-	pos	311.133	C11H20N4O5	1.5913	0.763383
Glu Phe	-	pos	295.129	C14H18N2O5	2.2652	1.05674
3,4,5-trihydroxy-6-{3-[3-(2-hydroxyphenyl)propanoyl]phenoxy}oxane-2-carboxylic acid	-	pos	441.116	C21H22O9	3.4551	1.3002
21-Deoxycortisol	C05497	pos	347.222	C21H30O4	4.9476	0.740193
PC(20:3/0:0)	-	pos	546.356	C28H52NO7P	7.9215	1.45096
LysoPC(P-18:0)	C04230	pos	508.377	C26H54NO6P	8.4652	1.28726
PC(17:0/0:0)	C04230	pos	510.356	C25H52NO7P	8.3813	1.27594
Sphingosine-1-phosphate	C06124	pos	380.256	C18H38NO5P	7.5875	0.863309
Cervonoyl ethanolamide	C13828	pos	337.253	C24H36O3	4.5911	0.666555
Undecanedioic acid	-	pos	181.123	C11H20O4	3.146	1.44821
7E,10-undecadien-4-olide	-	pos	181.123	C11H16O2	3.6996	1.39524
2-Formaminobenzoylacetate	C05835	pos	208.061	C10H9NO4	2.3098	1.2878
Trimethylamine N-oxide	C01104	pos	76.0764	C3H9NO	0.6784	9.63729
Cysteineglutathione disulfide	-	pos	427.096	C13H22N4O8S2	0.7554	1.32481
Galactose-beta-1,4-xylose	-	pos	335.095	C11H20O10	0.7749	0.782567
4-Methylene-L-glutamine	C01109	pos	159.077	C6H10N2O3	0.6784	1.30033
Trimethylaminoacetone	-	pos	116.107	C6H13NO	0.7554	3.16662
L-Canaline	C08270	pos	176.103	C4H10N2O3	0.8555	2.69107
Glu Thr	-	pos	249.108	C9H16N2O6	0.8958	0.746069
Adenine	C00147	pos	136.062	C5H5N5	0.9355	1.60889
6-(1-Hydroxyethyl)-2,2-dimethyl-2H-1-benzopyran	-	pos	237.149	C13H16O2	3.4777	-6.54632
8-Hydroxy-5,6-octadienoic acid	-	pos	198.113	C8H12O3	3.5218	2.52459
3,4-Methylenesebacic acid	-	pos	191.107	C12H18O4	3.6996	1.73153
11(12)-EpETE	-	pos	319.227	C20H30O3	5.8656	0.691212
6Z-Nonenoic acid	-	pos	157.123	C9H16O2	6.4997	1.48368
PS(O-20:0/0:0)	-	pos	540.366	C26H54NO8P	8.2339	0.290176
PE(22:1/0:0)	-	pos	536.372	C27H54NO7P	8.4652	1.23756
PC(20:1/0:0)	-	pos	550.387	C28H56NO7P	8.7409	0.795339
2-Methylglutaric acid	-	pos	129.055	C6H10O4	9.2874	2.00064
2-Hydroxypropyl 2-isopropyl-5-methylcyclohexyl carbonate	-	pos	259.191	C14H26O4	9.2874	0.910978
Monoethylhexyl phthalic acid	C03343	pos	279.159	C16H22O4	9.2415	1.02535
Sphinganine-phosphate	C01120	pos	382.272	C18H40NO5P	7.7755	0.940342
4,5-Dihydrovomifoliol	-	pos	209.154	C13H22O3	5.2145	1.54168
Traumatic acid	C16308	pos	193.123	C12H20O4	5.0808	2.16471
15(R)-15-methyl Prostaglandin A2	-	pos	349.238	C21H32O4	4.6579	-0.0493713
Carvone oxide	C09841	pos	167.107	C10H14O2	3.3679	1.8941
THTC	C11074	pos	150.059	C5H8O2S	0.9355	1.55905
Adenosine 3'-monophosphate	-	pos	348.071	C10H14N5O7P	1.2324	0.869127
N6,N6,N6-Trimethyl-L-lysine	C03793	pos	189.16	C9H20N2O2	0.6217	1.51091
2-O-Methylcytosine	-	pos	158.093	C5H7N3O	1.4472	2.47333
3-Amino-2-piperidone	-	pos	153.041	C5H10N2O	1.4682	1.80671
Adenosine	C00212	pos	268.104	C10H13N5O4	1.507	0.850209
Hypoxanthine	C00262	pos	137.046	C5H4N4O	1.5501	1.2769
1-Carbapen-2-em-3-carboxylic acid	C06669	pos	154.05	C7H7NO3	1.5913	1.62241
4-Pyridoxic acid	C00847	pos	184.061	C8H9NO4	1.632	0.907229
1-Methylinosine	-	pos	283.104	C11H14N4O5	1.674	0.791855
Ser Ile Ala Asp	-	pos	405.199	C16H28N4O8	1.7345	1.29511
Thymine	C00178	pos	127.051	C5H6N2O2	1.716	4.14311
Asp Pro Met	-	pos	362.138	C14H23N3O6S	1.8408	0.835617
4-HYDROXY-6-METHYLPYRAN-2-ONE	-	pos	127.039	C6H6O3	2.1797	2.55414
4-Isopropyl-3-cyclohexene-1-carboxylic acid	-	pos	169.123	C10H16O2	2.1579	2.68548
Hippuric acid	C01586	pos	180.066	C9H9NO3	2.419	1.78473
Octanoylglucuronide	-	pos	343.137	C14H24O8	2.4617	1.56282
D-Biotin	C00120	pos	245.095	C10H16N2O3S	2.4836	1.45869
5-Hydroxy-6-methoxyindole glucuronide	-	pos	340.103	C15H17NO8	2.4836	1.13414
ACETYL-L-CYSTEINE	-	pos	164.038	C5H9NO3S	2.8788	3.0042
Imidazoleacetic acid	C02835	pos	127.05	C5H6N2O2	0.8757	2.32419
Ribothymidine	-	pos	259.093	C10H14N2O6	0.8757	0.749853
Asparaginyl-Proline	-	pos	212.103	C9H15N3O4	0.8958	0.548716
Niacinamide	C00153	pos	123.056	C6H6N2O	1.2964	2.64301
Guanine	C00242	pos	152.057	C5H5N5O	1.2964	1.16698
DL-Ornithino-L-alanine	-	pos	202.119	C8H17N3O4	1.4472	1.44737
(3b,6b,8a,12a)-8,12-Epoxy-7(11)-eremophilene-6,8,12-trimethoxy-3-ol	-	pos	365.174	C18H30O5	1.4872	6.1684
5'-Deoxy-5'-(methylthio)adenosine	C00170	pos	298.097	C11H15N5O3S	1.8201	1.19093
Vanillactic acid	-	pos	230.103	C10H12O5	2.0521	1.41109
2-Methylfuran	-	pos	83.0498	C5H6O	2.0724	8.36916
N-Monodesmethyl-rizatriptan	-	pos	318.191	C15H19N5O	2.1156	-3.79161
Tyrosyl-Proline	-	pos	317.09	C14H18N2O4	2.1579	1.25606
Nicotine glucuronide	-	pos	718.326	C16H22N2O6	2.419	-4.46237
Icariside B8	-	pos	427.169	C19H32O8	2.4617	-8.99577
Ganosporeric acid A	C16526	pos	540.273	C30H38O8	2.5265	9.11322
7-Hydroxy-6-(methoxyacetyl)-2,2-dimethyl-2H-1-benzopyran	-	pos	249.112	C14H16O4	2.5699	0.786243
Mevalonolactone	-	pos	172.097	C6H10O3	2.7007	2.06741
L-4-Chlorotryptophan	-	pos	280.085	C11H11ClN2O2	2.901	1.43182
CMPF	-	pos	241.105	C12H16O5	2.923	-8.40376
P-Isopropylphenol	-	pos	137.096	C9H12O	2.9456	2.04777
THYMOQUINONE	-	pos	165.091	C10H12O2	2.9456	1.594
4-Isopropylphenylacetaldehyde	-	pos	163.112	C11H14O	2.9675	1.51037
3-hydroxyoctanoyl carnitine	-	pos	304.212	C15H29NO5	3.0563	1.15384
Jasmonic acid	C08491	pos	252.16	C12H18O3	3.1012	1.3644
Serotonin	C00780	pos	159.092	C10H12N2O	3.2569	1.55757
12-hydroxyjasmonic acid	C21669	pos	227.128	C12H18O4	3.5218	1.81136
Atrolactic acid	C05584	pos	167.071	C9H10O3	3.9669	1.82719
(+/-)-Octanoylcarnitine	-	pos	288.217	C15H29NO4	4.1677	1.16648
Achillicin	-	pos	307.152	C17H22O5	4.9921	-6.19035
MG(0:0/18:4(6Z,9Z,12Z,15Z)/0:0)	-	pos	368.28	C21H34O4	5.8441	1.47317
9,12-Hexadecadienoylcarnitine	-	pos	396.311	C23H41NO4	6.4127	1.37221
3-hydroxyhexadecanoyl carnitine	-	pos	398.327	C23H45NO5	6.7849	1.27762
Palmitoyl-L-carnitine	C02990	pos	400.343	C23H45NO4	7.2047	1.24097
(E)-2-Penten-1-ol	-	pos	104.107	C5H10O	9.3789	5.26691
Cucurbic acid	C08482	pos	213.149	C12H20O3	10.0496	1.05996
5-Acetoxydihydrotheaespirane	-	pos	287.222	C15H26O3	9.7661	0.718245
Maltyl isobutyrate	-	pos	238.109	C10H12O4	9.2874	7.61037
Benzoquinoneacetic acid	-	pos	167.034	C8H6O4	9.2415	1.56856
PC(19:0/0:0)	-	pos	538.387	C27H56NO7P	8.9976	1.25494
PC(20:2/0:0)	-	pos	548.372	C28H54NO7P	8.2965	1.33396
PC(22:4/0:0)	-	pos	572.372	C30H54NO7P	8.1298	1.34929
LysoPE(20:3(5Z,8Z,11Z)/0:0)	-	pos	504.309	C25H46NO7P	7.9839	1.42875
O-Arachidonoyl Glycidol	-	pos	361.274	C23H36O3	7.6293	0.838931
(+/-)-Myristoylcarnitine	-	pos	372.311	C21H41NO4	6.6083	1.17397
Ethyl 3-cyclohexylpropionate	-	pos	185.154	C11H20O2	6.4997	1.63476
3-hydroxytetradecanoyl carnitine	-	pos	370.296	C21H41NO5	6.2408	1.16248
Isoalantolactone	C09484	pos	233.154	C15H20O2	6.1319	1.64562
P-Tolualdehyde	C06758	pos	121.065	C8H8O	6.1319	3.10125
Dodecanoylcarnitine	-	pos	344.28	C19H37NO4	5.9321	1.18099
5,7,9,11,13-tetradecapentaenoic acid	-	pos	219.138	C14H18O2	5.7571	1.71218
3-hydroxydodecanoyl carnitine	-	pos	342.264	C19H37NO5	5.5206	1.05552
Parthenolide	C07609	pos	249.149	C15H20O3	5.2806	0.806921
Tricycloekasantal	-	pos	179.143	C12H18O	5.2806	1.46436
Phenylbutyrylglutamine	-	pos	315.134	C15H20N2O4	4.9039	9.33095
Cortisol	C00735	pos	363.217	C21H30O5	4.792	1.0913
9Z,13-Tetradecadien-11-ynal	-	pos	205.159	C14H20O	4.6801	1.81263
2,6-Dimethyl-5-heptenoic acid	-	pos	157.123	C9H16O2	4.5691	1.82342
3,5,5-Trimethyl-3-cyclohexen-1-one	-	pos	156.139	C9H14O	4.5691	2.21554
3-hydroxydecanoyl carnitine	-	pos	332.244	C17H33NO5	4.3457	1.18081
Chaetoglobosin A	-	pos	529.274	C32H36N2O5	4.2563	8.31028
Norecasantalic acid	-	pos	181.123	C11H16O2	4.212	1.63547
16-bromo-9E-hexadecenoic acid	-	pos	333.145	C16H29BrO2	4.1225	7.54748
2,3-dihydrobenzofuran	-	pos	121.065	C8H8O	3.9669	3.26109
8-Dodecynoic acid	-	pos	197.154	C12H20O2	3.8999	2.0341
5,7-Megastigmadien-9-ol glucoside	-	pos	374.254	C19H32O6	3.8108	1.53397
Hydroxyibuprofen	-	pos	223.133	C13H18O3	3.7218	1.84882
Hexyl glucoside	-	pos	309.127	C12H24O6	3.6554	-5.47002
Cinnamic acid	C10438	pos	131.049	C9H8O2	3.5444	2.07693
Equol 7-O-glucuronide	-	pos	436.161	C21H22O9	3.4551	1.70002
Cyclohexanone	C00414	pos	99.0811	C6H10O	3.3679	6.5936
Deoxyvasicinone	C10659	pos	187.087	C11H10N2O	3.1902	1.96063
1-ACETYLPIPERIDINE	-	pos	128.107	C7H13NO	3.0341	2.60004
(+/-)-Hexanoylcarnitine	-	pos	260.186	C13H25NO4	2.8117	1.26536
3-Caren-5-one	-	pos	151.112	C10H14O	2.7449	2.44191
(3Z,6Z)-3,6-Nonadienal	C16323	pos	180.139	C9H14O	2.7449	2.08175
(3E,5Z)-3,5-Octadien-1-ol	-	pos	109.102	C8H14O	2.7449	3.81414
Beta-Dolabrin	-	pos	163.076	C10H10O2	2.7227	1.8485
N-(3-oxo-octanoyl)-homoserine lactone	C11841	pos	242.139	C12H19NO4	2.6787	1.23419
(S)C(S)S-S-Methylcysteine sulfoxide	-	pos	134.027	C4H9NO3S	2.5265	1.96542
2-Hydroxy-cis-hex-2,4-dienoate	C11354	pos	129.055	C6H8O3	2.5265	2.60618
Kaempferol 3-(2''-rhamnosyl-6''-acetylgalactoside) 7-rhamnoside	-	pos	824.259	C35H42O20	2.419	-2.04301
3-Hydroxyoctanoic acid	C20793	pos	205.082	C8H16O3	2.419	6.98622
1-Methylhistamine	C05127	pos	126.103	C6H11N3	2.3533	1.93311
L-Cysteine	C00097	pos	122.027	C3H7NO2S	2.3098	3.07196
3-Methoxytyrosine	-	pos	212.092	C10H13NO4	2.2003	1.37483
3,7,8,15-Scirpenetetrol	-	pos	316.176	C15H22O6	1.9693	0.962436
3,4,5-trihydroxy-6-{[(3E)-4-(1-oxo-1H-isochromen-3-yl)but-3-en-2-yl]oxy}oxane-2-carboxylic acid	-	pos	434.146	C19H20O9	1.9508	3.84889
Xi-2,3-Dihydro-3,5-dihydroxy-6-methyl-4H-pyran-4-one	-	pos	200.092	C7H10O4	1.9066	2.51146
Formyl-5-hydroxykynurenamine	C05647	pos	173.071	C10H12N2O3	1.8408	1.41467
Asp Ala	-	pos	205.082	C7H12N2O5	1.7345	1.3711
Porphobilinogen	C00931	pos	227.103	C10H14N2O4	1.716	0.918677
1-Methylhypoxanthine	-	pos	151.062	C6H6N4O	1.674	1.85542
2-Methylguanosine	-	pos	298.115	C11H15N5O5	1.6526	0.883443
6-O-Methylguanine	-	pos	166.072	C6H7N5O	1.6526	0.914587
Val Pro	-	pos	215.139	C10H18N2O3	1.611	1.11347
N-Methyl-4-pyridone-3-carboxamide	-	pos	153.066	C7H8N2O2	1.611	1.69271
1,1'-(Tetrahydro-6a-hydroxy-2,3a,5-trimethylfuro[2,3-d]-1,3-dioxole-2,5-diyl)bis-ethanone	-	pos	276.144	C12H18O6	1.5705	0.991458
Glycyl-Lysine	-	pos	245.161	C8H17N3O3	1.507	1.17367
Cotinine glucuronide	C00190	pos	353.135	C16H20N2O7	1.4872	1.08852
(R)-3-hydroxybutyrylcarnitine	-	pos	248.149	C11H21NO5	1.4682	0.875719
Isoleucylproline	-	pos	229.155	C11H20N2O3	1.4472	0.995548
Tyramine glucuronide	C03033	pos	314.124	C14H19NO7	1.2532	0.47995
L-gamma-glutamyl-L-isoleucine	-	pos	261.145	C11H20N2O5	0.974	0.542993
Acipimox (5-methylpyrazine-2-carboxylic acid)	-	pos	139.05	C6H6N2O2	0.9355	1.45683
(+/-)-2-Methylthiazolidine	-	pos	104.053	C4H9NS	0.9355	4.58767
4-Guanidinobutanoic acid	C01035	pos	146.093	C5H11N3O2	0.9162	1.21284
METHACHOLINE	C07471	pos	160.133	C8H17NO2	0.8958	1.30354
2-Ethylacrylic acid	-	pos	101.06	C5H8O2	0.8958	5.04757
2-Methylbutanal	C02223	pos	87.0797	C5H10O	0.8555	-8.30235
N-Nitrosoguvacoline	C19482	pos	171.077	C7H10N2O3	0.8349	1.24015
L-Histidinol	C00860	pos	124.087	C6H11N3O	0.8349	2.29253
4-Acetamido-2-aminobutanoic acid	C06442	pos	143.082	C6H12N2O3	0.7749	1.40347
Dihydromaleimide beta-D-glucoside	-	pos	244.079	C10H15NO7	0.7353	-8.36197
Trigonelline	C01004	pos	138.055	C7H7NO2	0.7353	1.03591
Formimino-L-glutamic acid	C00439	pos	175.072	C6H10N2O4	0.7166	1.2207
Isoputreanine	-	pos	193.155	C7H16N2O2	0.6784	1.64276
Trigonellinamide	C02918	pos	137.071	C7H8N2O	0.6784	1.24249
2-Cyclopentene-1,4-dione	-	pos	97.0289	C5H4O2	0.6577	5.42821
{[1-hydroxy-1-(1-oxo-1H-isochromen-3-yl)but-3-en-2-yl]oxy}sulfonic acid	-	pos	313.036	C13H12O7S	0.5654	-5.03916
L-Ornithine	C00077	pos	133.097	C5H12N2O2	0.5233	1.7941
7-Methylguanine	C02242	pos	166.073	C6H7N5O	1.4472	1.43945
Gibberellin A37	C14161	pos	347.186	C20H26O5	3.6109	1.0582
2-[3-(sulfooxy)phenyl]acetic acid	-	neg	230.996	C8H8O6S	1.8711	-5.70857
Gamma-Glutamylvaline	-	neg	245.113	C10H18N2O5	1.7159	-4.8339
4,11,13,15-Tetrahydroridentin B	-	neg	267.159	C15H24O4	6.1311	-3.71477
Hydroxyphenyllactic acid	C03672	neg	181.049	C9H10O4	2.0472	-8.64072
LysoPC(16:0)	C04230	neg	540.329	C24H50NO7P	8.044	-2.98114
Gamma-Glutamylphenylalanine	-	neg	293.113	C14H18N2O5	2.2648	-3.33914
3-Hydroxysebacic acid	-	neg	217.107	C10H18O5	2.9279	-6.38661
Guanidylic acid (guanosine monophosphate)	-	neg	362.049	C10H14N5O8P	0.9331	-3.49444
Aspartyl-Glutamate	-	neg	243.061	C9H14N2O7	0.9331	-4.89905
Glutathione, oxidized	C00127	neg	611.143	C20H32N6O12S2	1.4486	-2.90715
Vanillic acid 4-sulfate	-	neg	246.991	C8H8O7S	1.7817	-4.95426
3-hydroxybenzoic acid-3-O-sulphate	-	neg	216.98	C7H6O6S	2.0251	-6.46462
Gamma-Glu-Leu	-	neg	259.129	C11H20N2O5	2.1989	-4.20291
3,4,5-trihydroxy-6-{[3-(3-hydroxyphenyl)propanoyl]oxy}oxane-2-carboxylic acid	-	neg	341.086	C15H18O9	2.2206	-4.00165
2,8-Dihydroxyquinoline-beta-D-glucuronide	-	neg	336.071	C15H15NO8	2.287	-3.67128
6-Hydroxy-5-methoxyindole glucuronide	-	neg	338.087	C15H17NO8	2.486	-3.50385
Epinephrine sulfate	-	neg	244.027	C9H13NO6S	1.7159	-4.55367
2-Hydroxydecanedioic acid	-	neg	217.107	C10H18O5	3.4428	-6.27548
Shikimic acid	C00493	neg	155.033	C7H10O5	1.7159	-8.65525
Sebacic acid	C08277	neg	201.112	C10H18O4	4.4519	-7.26712
2,2'-(3-methylcyclohexane-1,1-diyl)diacetic acid	-	neg	213.112	C11H18O4	4.5865	-6.4924
Tauro-b-muricholic acid	-	neg	514.283	C26H45NO7S	4.6087	-3.4264
Alpha-dihydroartemisinin	-	neg	283.154	C15H24O5	5.3902	-3.53182
C75	-	neg	253.143	C14H22O4	5.7729	-4.4235
5-Nonyltetrahydro-2-oxo-3-furancarboxylic acid	-	neg	255.159	C14H24O4	5.9522	-4.14266
Citric acid	C00158	neg	191.018	C6H8O7	1.3172	-7.83045
LysoPC(18:3(6Z,9Z,12Z))	C04230	neg	562.313	C26H48NO7P	7.3567	-2.33156
12(R)-HETE	C14822	neg	319.227	C20H32O3	7.6044	-3.44263
Myo-Inositol	C00137	neg	179.055	C6H12O6	0.728	-8.86358
Fructosamine	-	neg	160.06	C6H13NO5	0.9725	-9.13683
3-Dehydroquinate	C00944	neg	189.039	C7H10O6	1.5144	-7.74799
(3-Methoxy-4-hydroxyphenyl)ethylene glycol sulfate	-	neg	263.022	C9H12O7S	1.5593	-3.95701
Benzyl sulfate	-	neg	233.011	C7H8O4S	1.7376	-7.14924
(5-ethenyl-2-hydroxyphenyl)oxidanesulfonic acid	-	neg	261.006	C8H8O5S	1.8929	-4.96229
Butyric acid	C00246	neg	109.028	C4H8O2	2.0033	7.57516
Alpha-D-Galacturonic acid	-	neg	193.034	C6H10O7	2.0033	-7.29144
S-Methyl hexanethioate	-	neg	337.149	C7H14OS	2.0472	-6.87264
4-Hydroxybenzenesulfonic acid	-	neg	172.99	C6H6O4S	2.1562	-9.22035
Indoxyl glucuronide	-	neg	308.076	C14H15NO7	2.287	-3.50866
Indoxylsulfuric acid	-	neg	212.001	C8H7NO4S	2.3094	-6.66393
Fructose 1-phosphate	C01094	neg	296.979	C6H13O9P	2.3094	1.53685
4-Vinylphenol sulfate	-	neg	245.011	C8H8O4S	2.4194	-6.24885
2-Acetolactate	C00900	neg	153.018	C5H8O4	2.8832	5.86725
Equol 4'-O-glucuronide	-	neg	417.118	C21H22O9	3.4428	-2.89105
Atractyligenin	-	neg	363.217	C20H30O3	5.4129	-3.60327
Hepoxilin B3	C14810	neg	335.222	C20H32O4	7.0891	-3.18023
PE(18:3/0:0)	-	neg	474.261	C23H42NO7P	7.3567	-3.31423
LysoPC(15:0)	C04230	neg	480.308	C23H48NO7P	8.044	-2.85369
2-hydroxyhexadecanoic acid	-	neg	271.227	C16H32O3	8.6266	-3.40597
9-Oxooctadecanoic acid	-	neg	297.242	C18H34O3	8.7209	-3.74488
DL-2-hydroxy stearic acid	-	neg	299.258	C18H36O3	9.1366	-3.76565
(1R,2S,3S,4R)-p-Menthane-2,3-diol	-	neg	209.093	C10H20O2	9.182	-8.91577
NORETHINDRONE ACETATE	C08152	neg	339.199	C22H28O3	9.182	6.07262
Piperoic acid	-	neg	339.199	C22H30O4	8.8504	5.79621
2-Dodecylbenzenesulfonic acid	-	neg	325.183	C18H30O3S	8.4475	-3.53614
10-Oxo-11-octadecen-13-olide	-	neg	293.211	C18H30O3	7.8315	-3.18877
13(S)-HODE	C14762	neg	295.227	C18H32O3	7.4239	-3.90122
10,11-dihydro-20-trihydroxy-leukotriene B4	-	neg	385.222	C20H34O7	6.8221	-3.0552
10-hydroxy-2E-decenoic acid	-	neg	185.117	C10H18O3	5.4805	-7.93213
L-Menthyl acetoacetate	-	neg	285.17	C14H24O3	5.1206	-4.33235
3,4-Dimethyl-5-pentyl-2-furanpropanoic acid	-	neg	283.154	C14H22O3	4.9863	-4.25612
4-Hydroxyretinoic acid	C16677	neg	361.201	C20H28O3	4.8102	-3.81126
Riesling acetal	-	neg	271.154	C13H22O3	4.6979	-4.28926
Valproic acid glucuronide	-	neg	319.139	C14H24O8	2.4639	-3.88361
3-Formyl-6-hydroxyindole	-	neg	206.044	C9H7NO2	2.3094	-9.04747
Phenyl glucuronide	-	neg	269.066	C12H14O7	2.2432	-3.71983
[(3-phenyloxiran-2-yl)methoxy]sulfonic acid	-	neg	275.022	C9H10O5S	2.1781	-4.2119
2,4-Dimethylpimelic acid	-	neg	233.102	C9H16O4	1.9378	-7.46185
Tyrosol 4-sulfate	-	neg	217.016	C8H10O5S	1.8488	-6.34364
Isoleucyl-Hydroxyproline	-	neg	243.134	C11H20N2O4	1.6712	-5.01245
Norvaline	C01799	neg	138.054	C5H11NO2	1.626	6.45714
Inosine	C00294	neg	267.072	C10H12N4O5	1.5367	-3.7068
3,4,5-trihydroxy-6-[(2-methylpropanoyl)oxy]oxane-2-carboxylic acid	-	neg	285.061	C10H16O8	1.5144	5.36098
Hydroxymethoxyphenylcarboxylic acid-O-sulphate	-	neg	249.006	C8H10O7S	1.492	-4.59336
Uridine monophosphate (UMP)	-	neg	323.027	C9H13N2O9P	0.9135	-3.87156
Ascorbic acid-2-sulfate	-	neg	254.98	C6H8O9S	0.9135	-4.64023
L-glycyl-L-hydroxyproline	-	neg	233.077	C7H12N2O4	0.7484	-6.82483
Allantoic acid	C00499	neg	157.035	C4H8N4O4	0.6893	-9.46364
Citrulline	C00327	neg	174.087	C6H13N3O3	0.671	-9.31986
Adenosine monophosphate	C00946;C00020;C01367	neg	346.055	C10H14N5O7P	1.208	-3.73355
Hexadecanedioic acid	C19615	neg	285.206	C16H30O4	7.1778	-3.66374
Isocitrate	C00311	neg	191.018	C6H8O7	0.9331	-7.92804
L-Ascorbic acid	C00072	neg	351.056	C6H8O6	0.9135	-9.32955
N-Acetylneuraminic acid	C00270	neg	308.098	C11H19NO9	2.2432	-3.73422
